# Supplementary material for: Co doping promotes the alkaline overall seawater electrolysis performance over MnPSe3 nanosheets
Source: Royal Society of Chemistry journal article supplement (doi:10.1039/d3cc03434h), 2023-01-01
Supplement: d3cc03434h1.pdf [file d3cc03434h1.pdf]

## **Supplementary Material for**

# **Co doping promotes the alkaline overall seawater electrolysis performance over MnPSe<sub>3</sub> nanosheets**

*Hao Zhang et al.*

## **Experimental Section**

### ***Synthesis***

Synthesis of CMPS and MPS: The preparation procedure used was obtained from the relevant literature with some modifications (*ACS Catalysis*, 2017, 7, 8159). First, a quartz glass ampule containing 0.1 g of CoCl<sub>2</sub>, 1 g MnCl<sub>2</sub>, phosphorus (Red phosphorus, 99.999 %, 0.5 g), and selenium (99.999 %, 1 g) was sealed under a high vacuum. Next, the mixture described above was transferred to the tube furnace and pyrolyzed at 700 °C for 24 h with a heating rate of 5 °C min<sup>-1</sup>. After the samples were naturally cooled to room temperature, CMPS powder samples were obtained. The reference sample of MnPSe<sub>3</sub> (MPS) was prepared using the same synthetic route, except that no phosphorus source was involved.

### ***Characterizations***

The scanning electron microscopy (SEM, Quanta FEG 250) and transmission electron microscopy (TEM, Talos F200X) equipped with mapping of elements modules were performed to capture material morphological features. X-ray diffraction (XRD, Rigaku D/max 2500) instrumented with Cu K $\alpha$  radiation and X-ray photoelectron spectroscopy (XPS, ESCALAB 250Xi, Thermo Scientific) with Al K $\alpha$  radiation source were conducted to obtain crystalline structures and chemical composition, respectively. The cobalt doping amount was gathered through inductively coupled plasma (ICP, ICP-OES 8000DV, Optima). Meantime, the XPS spectra were calibrated to the C 1s peak at 284.5 eV before being analyzed.

### ***Electrochemical tests***

Electrochemical measurements, including HER and OER, were controlled via the electrochemical workstation (CHI 760E, Shanghai Chenhua) and three electrodes system with alkali media (1 M KOH, 1 M KOH + natural seawater). The carbon paper (HCP030N, 1.0  $\times$  1.5 cm<sup>2</sup>) loaded power ink as the work electrode, carbon rod (diameter, 6 mm) as the counter electrode, and Hg/HgO electrode as the reference electrode. The 5 mg catalyst materials (i.e., CMPS, MPS, Pt/C, and IrO<sub>2</sub>) were dispersed in a mixture solution including 450  $\mu$ L EtOH

and 50  $\mu\text{L}$  Nafion through 30 min ultrasonic treatment. Then, 100  $\mu\text{L}$  ink was applied dropwise to the carbon paper ( $1.0 \times 1.0 \text{ cm}^2$ ) and dried at 60  $^\circ\text{C}$  in an oven. Electrochemical impedance spectroscopy (EIS) was conducted in the range of 0.01 Hz  $\sim$  100 kHz with 300 mV overpotential applied to the OER and 200 mV overpotential applied to the HER. According to the formula of  $E_{\text{RHE}} = E_{\text{Hg/HgO}} + 0.059 \times \text{pH} + 0.098 \text{ V}$ , the reversible hydrogen electrode (RHE) serves as the reference potential for all measurements. And all reported data have been performed with iR compensation.

### ***DFT calculations***

The Device Studio program provides a number of functions for performing visualization, modeling and simulation.<sup>29,30</sup> DS-PAW software was used for the calculations.<sup>30</sup> The exchange–correlation potential was treated by Perdew-Burke-Ernzerhof (PBE) generalized gradient approximation (GGA) functional. During the configuration optimization, the convergence tolerance was setted to be  $1.0 \times 10^{-5} \text{ eV}$  for energy and  $0.05 \text{ eV } \text{\AA}^{-1}$  for force. The  $\text{MnPSe}_3$  (11-3) model was constructed by  $4 \times 4$  supercell with a vacuum region of 15  $\text{\AA}$ . Free energy for each reaction step was calculated as  $G = E_{\text{DFT}} + E_{\text{ZPE}} - T\Delta S$ , where  $E_{\text{DFT}}$  is the DFT calculated energy.

## Figures and Table

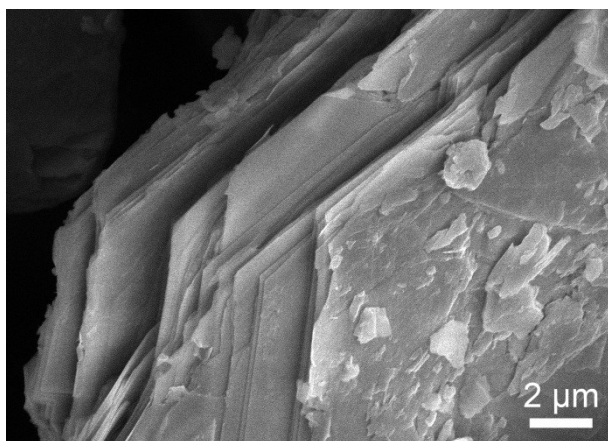

**Figure S1.** The SEM image of MPS.

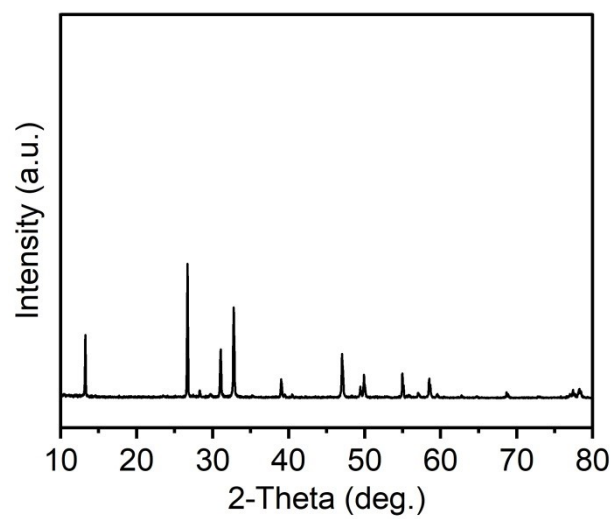

**Figure S2.** The XRD pattern of MPS.

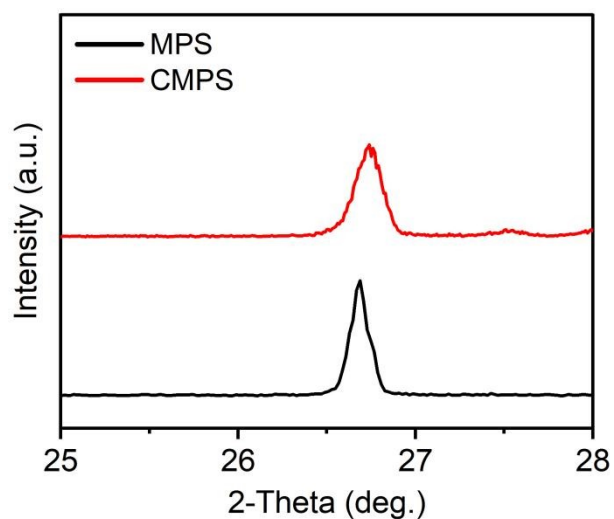

**Figure S3.** The enlarged XRD pattern of CMPS and MPS. As a result, the enlarged (006) diffraction peak at  $26.7^\circ$  of the CMPS is broadened and slightly shifted towards the high angle direction due to the Co atoms are doped at host Mn sites, indicating that Co doping induces distortion in the  $\text{MnPSe}_3$  lattice. (*J. Mater. Chem. A*, 2023, 11, 6625; *Chem. Eng. J.* 2022, 450, 138358)

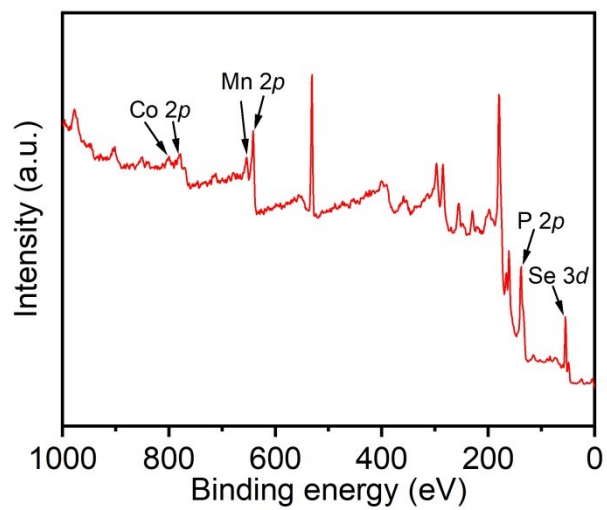

**Figure S4.** The survey scan spectrum of CMPS.

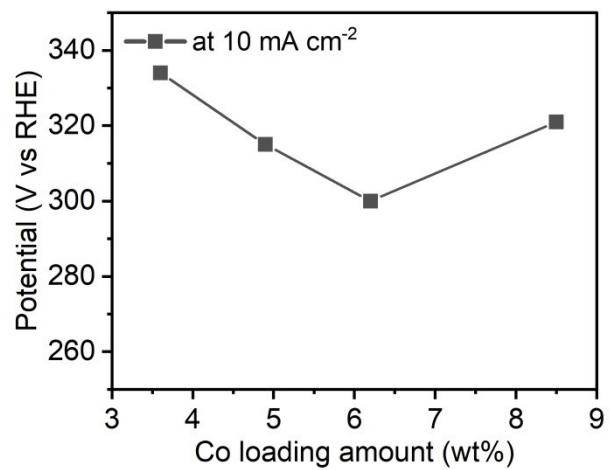

**Figure S5.** The potentials at 10 mA cm<sup>-2</sup> for CMPS with different Co loading amount by ICP measurement.



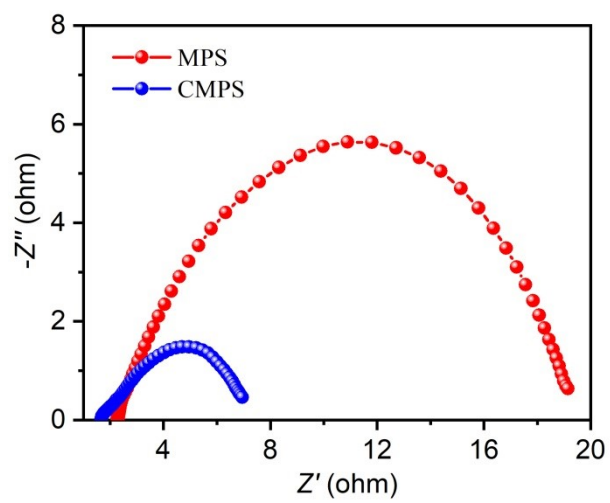

**Figure S6.** Nyquist plots with 300 mV overpotential.

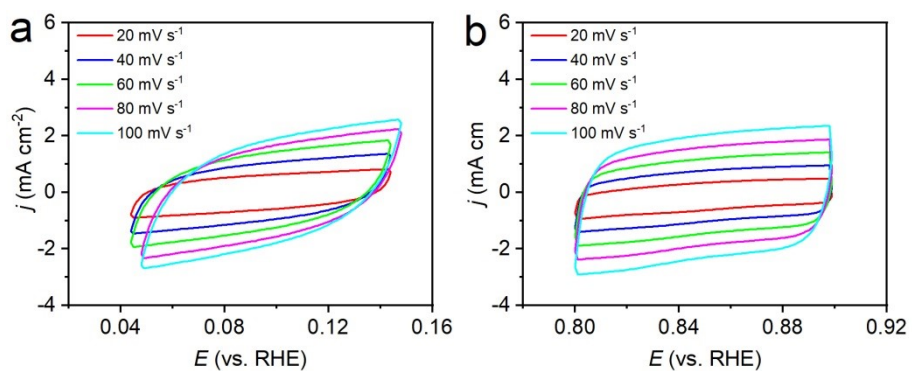

**Figure S7.** CV curves of (a) MPS and (b) CMPS at various scan rates from 20-100  $\text{mV s}^{-1}$  in the range of the non-faradaic region.

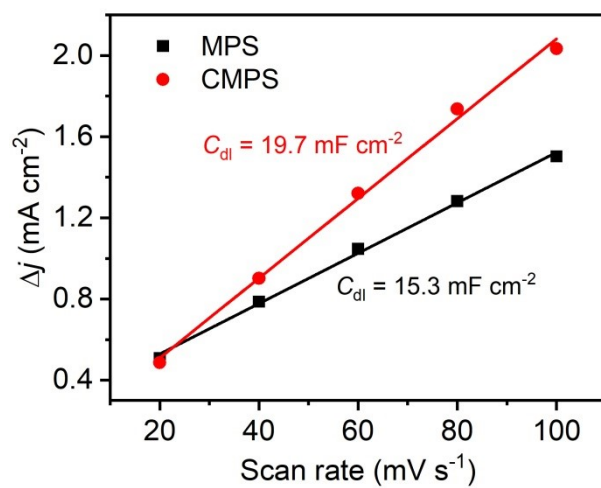

**Figure S8.** Electrochemical surface areas of the CMPS and MPS.

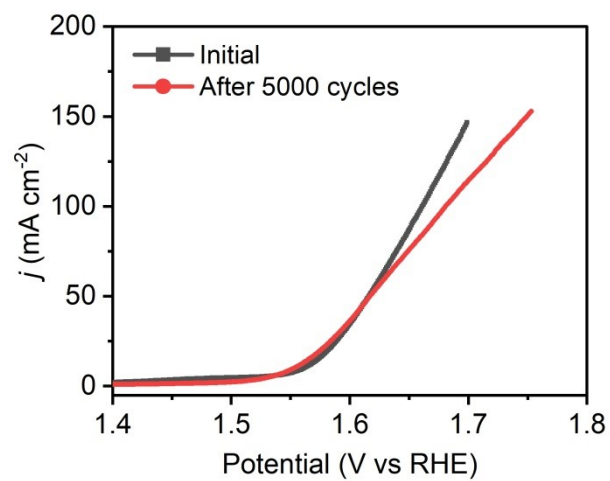

**Figure S9.** LSV curves of CMPS after 5,000 cycles at a scan rate of  $50 \text{ mV s}^{-1}$ .

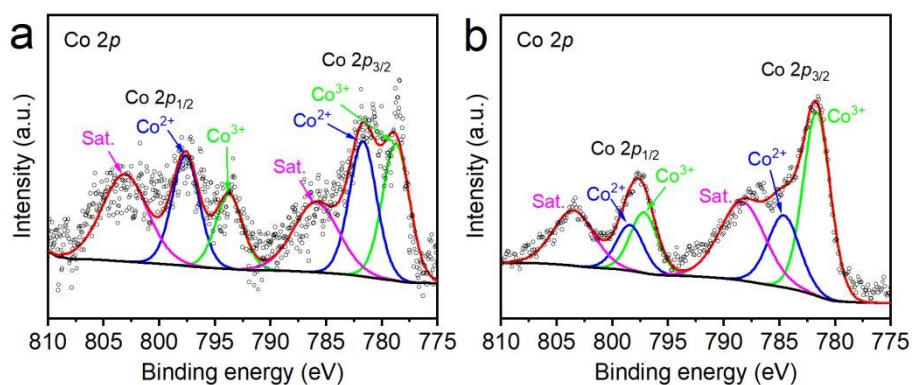

**Figure S10.** The high-resolution XPS spectra of Co 2p of CMPS before (left) and after (right) the OER stability test. It is found that more high valence state  $\text{Co}^{3+}$  species are observed due to the formation of Co-(oxy)hydroxides via electro-oxidation, i.e., the  $\text{Co}^{3+}/\text{Co}^{2+}$  ratio was increased from 1.18 before the reaction to 1.87 (J. Colloid Interface Sci. 2023, 645, 724). Previous research has shown that these generated (oxy)hydroxides derived from surface reconstruction are real reactive species, which plays a positive role in catalyst activity and stability for the OER (J. Colloid Interface Sci. 2023, 645, 724; Int. J. Hydrog. Energy 2023, 48, 5080).

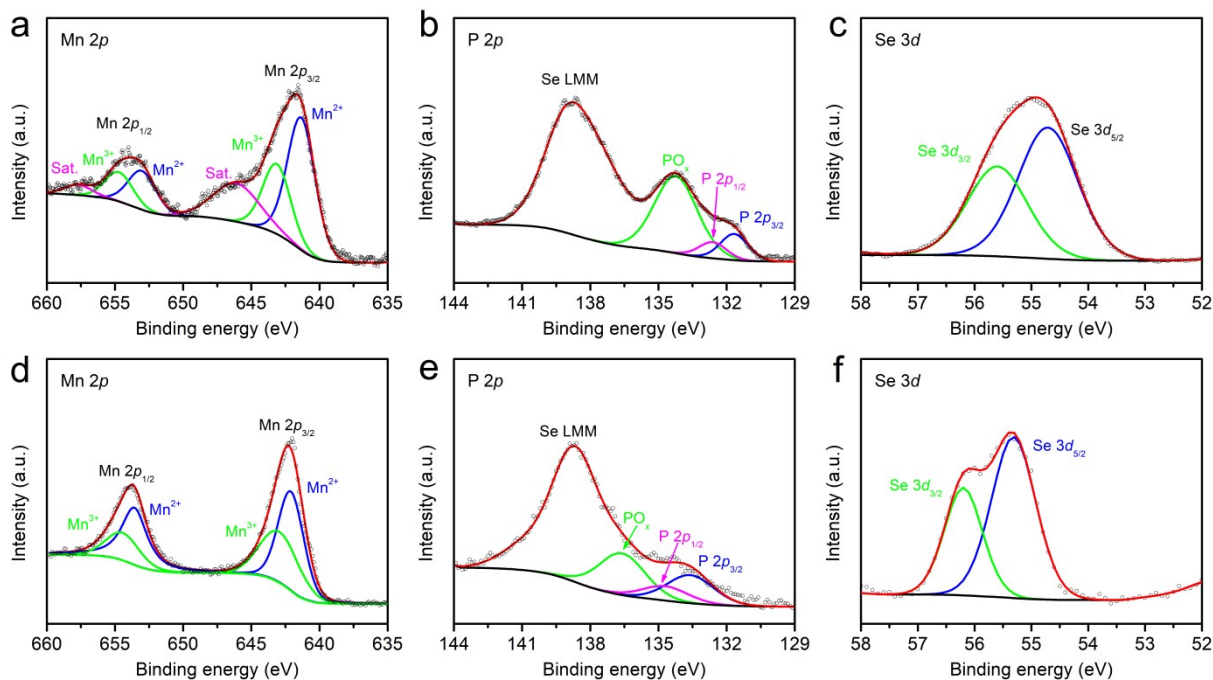

**Figure S11.** The high-resolution XPS spectra of (a, d) Mn 2p, (b, e) P 2p, and (c, f) Se 3d of CMPS before (top) and after (bottom) the OER stability test. Similar to the case of Co 2p, Mn 2p also showed an increase in Mn<sup>3+</sup>/Mn<sup>2+</sup> ratio from the original 0.58 to 0.72 after OER stability tests, implying the formation of an amorphous layer of Mn-hydroxide on the surface in reaction process (ACS Energy Lett. 2018, 3, 9, 2150-2158). For P 2p and Se 3d, the core peaks of them shifted to higher binding energy ( $\sim 2.0$  eV,  $\sim 0.6$  eV), suggesting a much stronger oxidation on the surface of the catalyst under OER conditions (Chem. Eng. J. 2020, 398, 125660; Adv. Mater. 2021, 33, 2007523; Chem. Eng. J. 2021, 420, 130461).

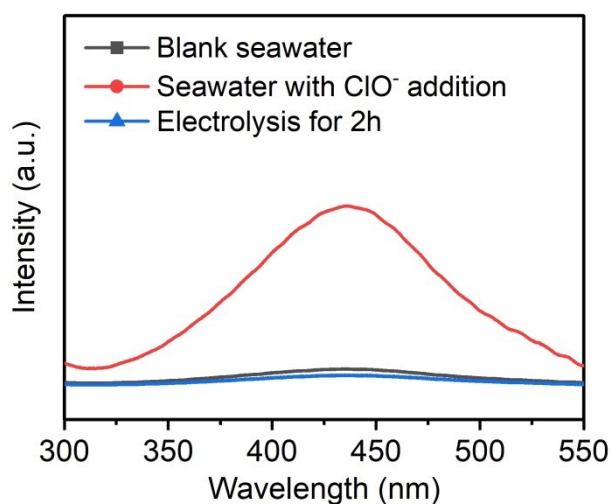

**Figure S12.** UV-vis absorption spectra of the electrolytes (0.1 mL) taken from various electrolysis conditions. It is found that no  $\text{ClO}^-$  generation is detected under a potential of 1.67 V vs RHE over 30 h. First, the chloride electro-oxidation reaction, i.e.,  $2\text{Cl}^- \rightarrow \text{Cl}_2 + 2\text{e}^-$  ( $E^\circ = 1.36$  V,  $\text{pH} = 0$ ) and  $\text{Cl}^- + 2\text{OH}^- \rightarrow \text{ClO}^- + \text{H}_2\text{O} + 2\text{e}^-$  ( $E^\circ = 0.89$  V,  $\text{pH} = 14$ ), is an important competing side reaction with OER on anode, and this reaction is capable of producing several chlorine species, e.g.,  $\text{Cl}_2$ ,  $\text{ClO}^-$ . (Angew. Chem.Int. Ed. 2022, 61, e202210753; ) All electrochemical tests in this work were performed in alkaline seawater (1 M KOH + natural seawater,  $\text{pH} \approx 13.8$ ), and the generated  $\text{Cl}_2$  can react with  $\text{OH}^-$ ,  $\text{Cl}_2 + 2\text{OH}^- \rightarrow \text{Cl}^- + \text{ClO}^-$ , so that  $\text{ClO}^-$  species can be used as evidence of whether  $\text{Cl}^-$  oxidation reactions are occurring or not. (Nat. Energy, 2020, 5,367-377; Nat. Commun. 2021, 12, 4182) Furthermore, compared to the lower thermodynamic potential of 1.23 V vs RHE for electrochemical water splitting, the oxidation potential of the chlorine electro-oxidation reactions was up to 1.72 V in alkaline seawater. (Nat. Commun. 2021, 12, 4182) However, after 30 h of stability measurement of the CMPS by applying a 1.67 V at  $100 \text{ mA cm}^{-2}$ , it was found that no  $\text{ClO}^-$  generation was detected, suggesting that the CMPS has better OER selectivity.

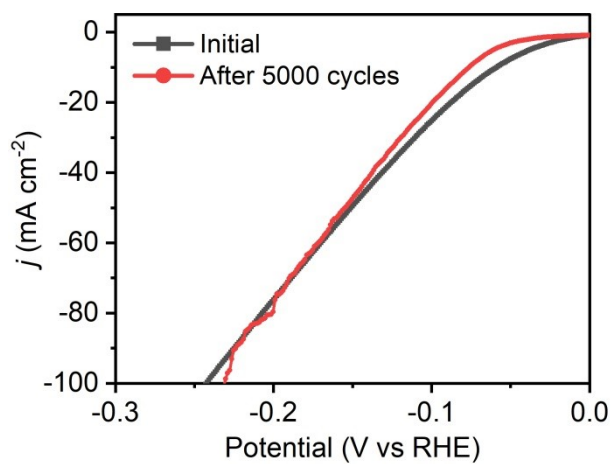

**Figure S13.** LSV curves of CMPS for HER initially and after 5,000 cycles at a scan rate of 50 mV s<sup>-1</sup>.



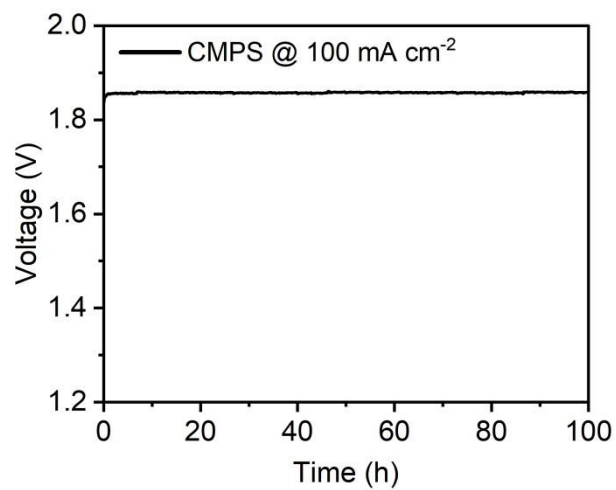

**Figure S14.** Chronoamperometry stability test at 100 mA cm<sup>-2</sup> for CMPS.

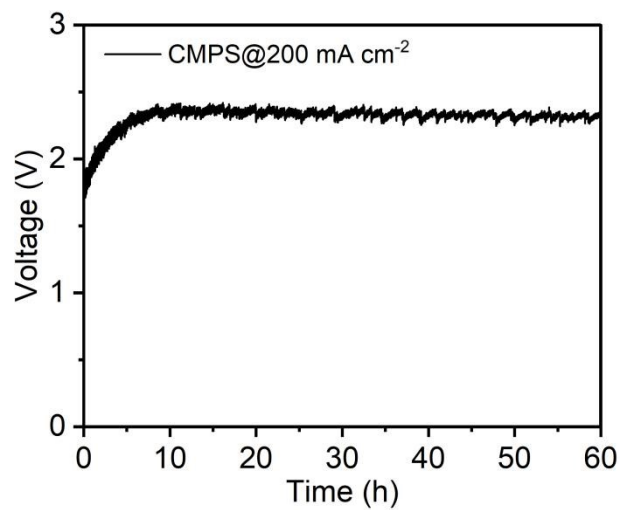

**Figure S15.** Chronoamperometry stability test of CMPS at 200 mA cm<sup>-2</sup> for 60 h.

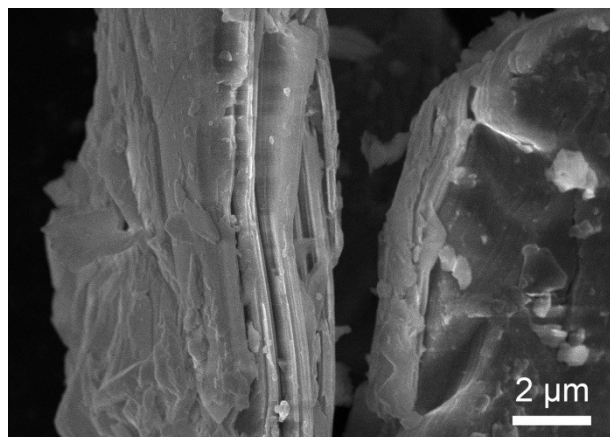

**Figure S16.** SEM image of the CMPS after the stability test.

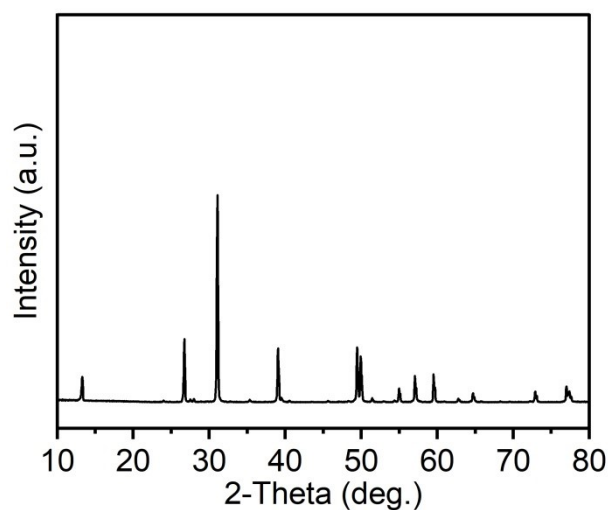

**Figure S17.** XRD pattern of the CMPS after the stability test. Through comparing the XRD characterization before and after stabilization (Figures 2a and S16), it was found that the CMPS catalyst changed some of the peak intensities after seawater electrolysis of long period and no new crystal structures were observed, which could be attributed to the formation of different catalytic species on the surface of the CMPS catalyst through oxidation.

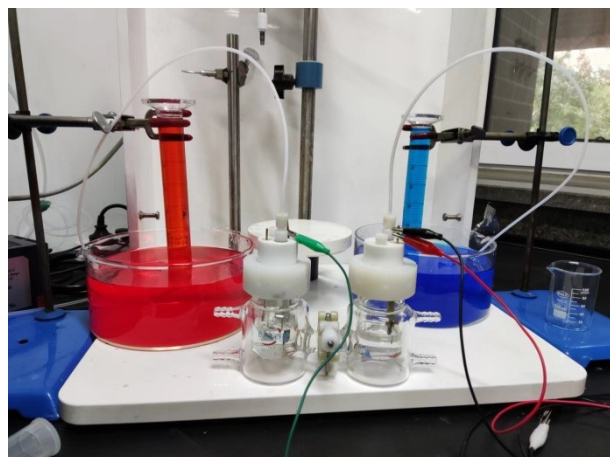

**Figure S18.** The gas collection device of water splitting in 1.0 M KOH + seawater solution.

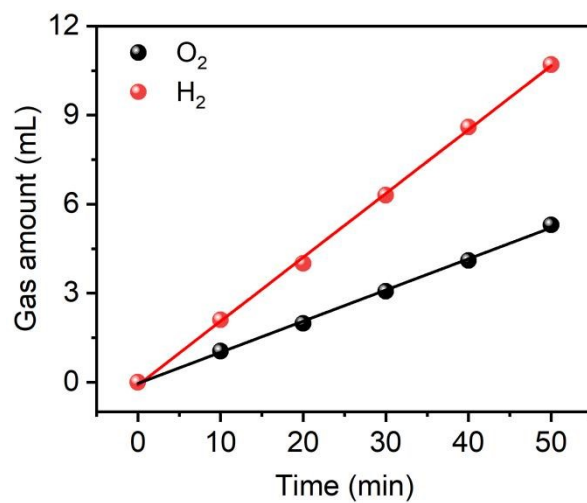

**Figure S19.** Generated volume of H<sub>2</sub> and O<sub>2</sub>.

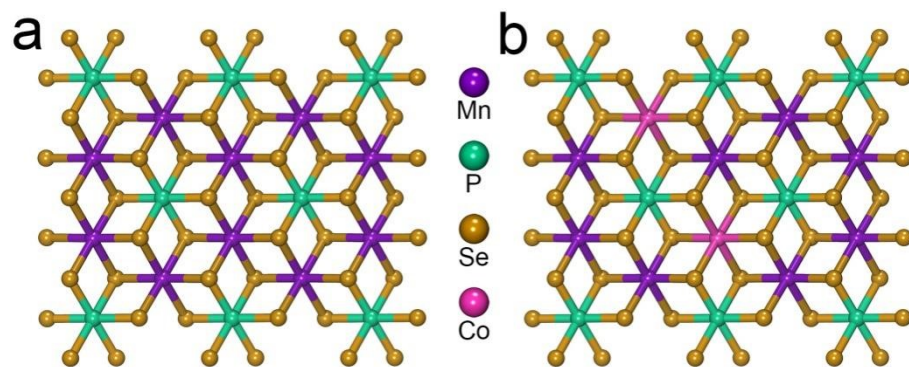

**Figure S20.** The theoretical models of (a) MPS and (b) CMPS.

**Table S1.** Comparison of alkaline seawater splitting performances for CMPS with other reported electrocatalysts.

| Catalysts                                                                            | Electrolyte          | Potential @ current density (V @ mA cm <sup>-2</sup> ) | Stability (mA cm <sup>-2</sup> , hours) | Reference                                    |
|--------------------------------------------------------------------------------------|----------------------|--------------------------------------------------------|-----------------------------------------|----------------------------------------------|
| CMPS                                                                                 | 1 M KOH + seawater   | 1.82 @ 100                                             | 100, 100                                | This work                                    |
| Mo-CoP <sub>x</sub> /NF                                                              | 1 M KOH + seawater   | 2.16 @ 100                                             | 100, 100                                | Mater. Today Nano, 2022, 18, 100216          |
| 1D-Cu@Co-CoO/Rh                                                                      | 1 M KOH + 0.5 M NaCl | 1.9 @ 100                                              | 10, 12                                  | Small, 2021, 17, 2103826                     |
| NiCoHPi@Ni <sub>3</sub> N/NF                                                         | 1 M KOH + 0.5 M NaCl | 1.86 @ 100                                             | 200, 40                                 | ACS Appl. Mater. Interfaces. 2022, 14, 22061 |
| Ni <sub>3</sub> S <sub>2</sub> -MoS <sub>2</sub> -Ni <sub>3</sub> S <sub>2</sub> /NF | 1 M KOH + seawater   | 1.82 @ 100                                             | 100, 100                                | Electrochimica Acta, 2021, 390, 138833       |
| Ni <sub>2</sub> P-Fe <sub>2</sub> P/NF                                               | 1 M KOH + seawater   | 1.811 @ 100                                            | 100, 48                                 | Adv. Funct. Mater., 2021, 31, 2006484        |
| RuNi-Fe <sub>2</sub> O <sub>3</sub> /IF                                              | 1 M KOH + seawater   | 1.73 @ 100                                             | 100, 100                                | Chinese J. Catal., 2022, 43, 2202            |
| CoP <sub>x</sub> @FeOOH/NF                                                           | 1 M KOH + seawater   | 1.71 @ 100                                             | 500, 80                                 | Appl. Catal. B Environ. 2021, 294, 120256    |
| NF@NiMoO <sub>4</sub> /N/P                                                           | 1 M KOH + 0.5 M NaCl | 1.70 @ 100                                             | 100, 24                                 | J. Electrochem. Soc., 2022, 169, 046511      |
| CNC-MO & CNC-MS                                                                      | 1 M KOH + 0.5 M NaCl | 1.61 @ 100                                             | 100, 120                                | Nano Energy, 2021, 87, 106160                |

The assembled CMPS//CMPS alkaline seawater electrolyzer can be can be stabilized for 100 h at 100 mA cm<sup>-2</sup> current densities and applied potential of ~1.82 V, and it was discovered that this CMPS electrocatalys were on par with or even superior to those of these reported catalysts in recent years in **Table S1**.

Also, we summarized the recently reported the ternary transition metal tri-chalcogenides (TMTCs)-based materials to compare the difference of them. For HER, the as-synthesized



CMPS possessed a lower overpotentials of 59 mV at 10 mA cm<sup>-2</sup> in alkaline seawater, which is better than the exfoliated layered MnPSe<sub>3</sub> (640 ± 87 mV in 0.5 M H<sub>2</sub>SO<sub>4</sub>; 992 ± 56 mV in 1 M KOH; Adv. Funct. Mater. 2018, 29, 1805975), MoS<sub>0.94</sub>Se<sub>0.53</sub> (150 mV in 0.5 M H<sub>2</sub>SO<sub>4</sub>; Adv. Mater. 2016, 28, 1427), Few-layered FePS<sub>3</sub> (108 ± 2 mV in 0.5 M H<sub>2</sub>SO<sub>4</sub>; 337 ± 4 mV in 1 M KOH; ACS Energy Lett. 2016, 1, 367), and BiPS<sub>4</sub> (400 ± 138 mV in 0.5 M H<sub>2</sub>SO<sub>4</sub>; ACS Appl. Mater. Interfaces 2017, 9, 12563). For OER, the CMPS's catalytic activity (300 mV at 10 mA cm<sup>-2</sup> in alkaline seawater) is also comparable to the reported materials, such as NiPS<sub>3</sub> (~840 mV in 1 M KOH; ACS Appl. Mater. Interfaces 2017, 9, 12563) and FePSe<sub>3</sub> (~370 mV in 1 M KOH; ACS Catal. 2017, 7, 8159-8170).
